# Supplementary material for: Facile fabrication of a BiOBr–Cu2+/TiO2 suspension for efficient equipment decontamination
Source: Royal Society of Chemistry journal article supplement (doi:10.1039/d2nj06342e), 2023-01-01
Supplement: d2nj06342e1.pdf [file d2nj06342e1.pdf]

Supplementary Material

**Facile fabrication of BiOBr-Cu<sup>2+</sup>/TiO<sub>2</sub> suspension for efficient  
equipment decontamination**

Jie Zhang<sup>a</sup>, Xuemeng Tian<sup>b,\*</sup>, Chaochao Dong<sup>b</sup>, Ruixia Gao<sup>b</sup>, Yuan Hu<sup>a,\*\*</sup>

<sup>a</sup> *State Key Lab of Fire Science, University of Science and Technology of China, Hefei,  
230027, China*

<sup>b</sup> *School of Chemistry, Xi'an Jiaotong University, Xi'an, 710049, P.R. China*

\*Corresponding author.

\*\*Corresponding author.

*E-mail address:* yuanhu@ustc.edu.cn (Y. Hu), txm1996@stu.xjtu.edu.cn (X. Tian).

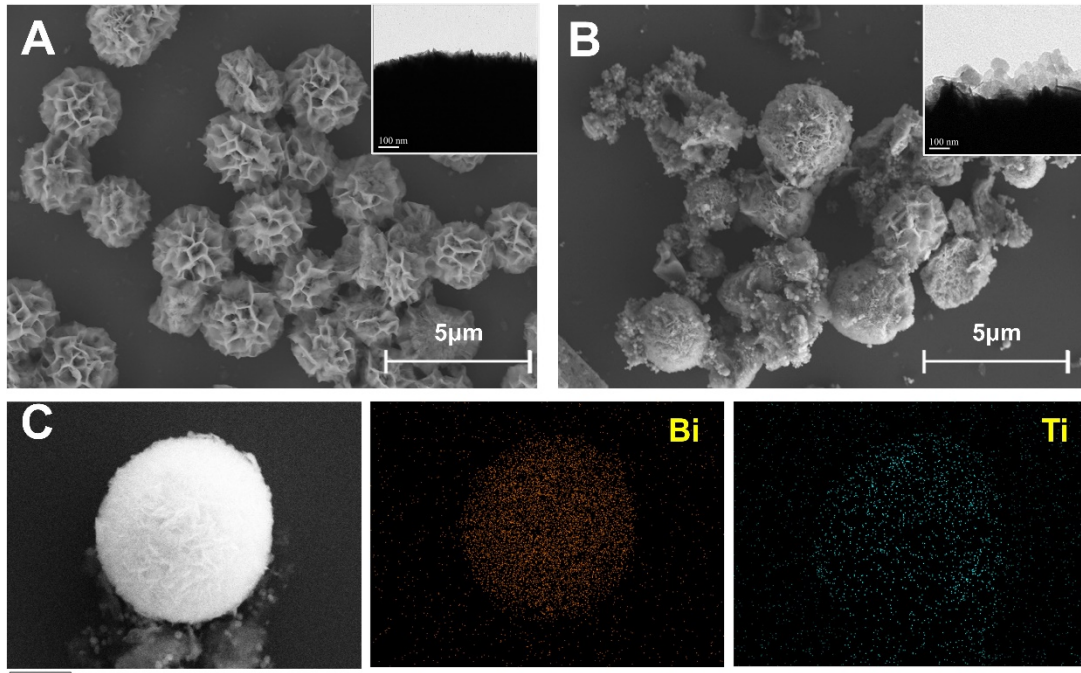

**Figure S1 SEM of BiOBr-Cu<sup>2+</sup> (A) and BiOBr-Cu<sup>2+</sup>/TiO<sub>2</sub> (B) with the inset of corresponding TEM. Elemental mapping of BiOBr-Cu<sup>2+</sup>/TiO<sub>2</sub> (C).**

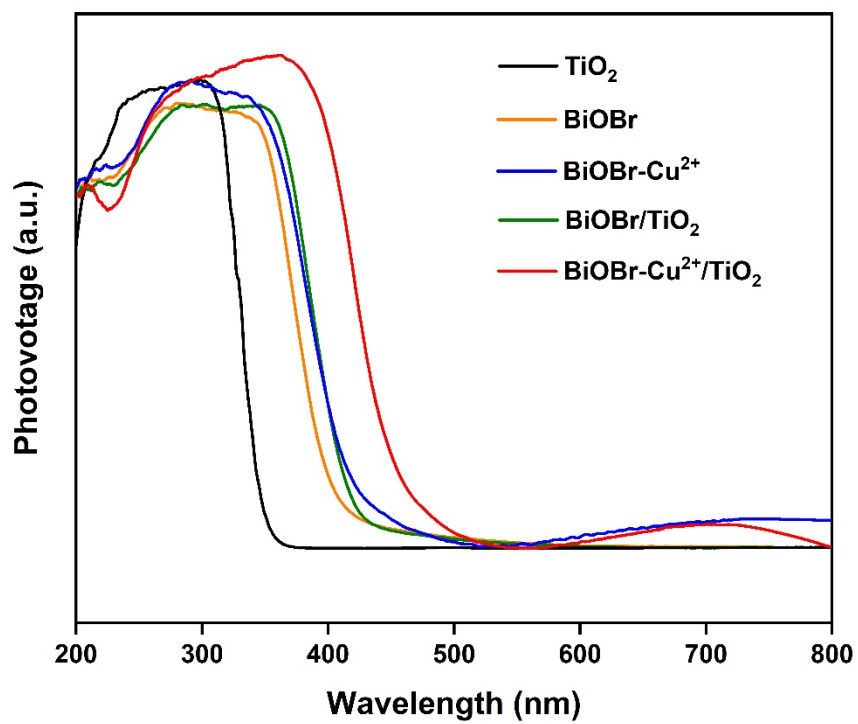

Figure S2 UV-vis DRS of  $\text{TiO}_2$ ,  $\text{BiOBr}$ ,  $\text{BiOBr-Cu}^{2+}$ ,  $\text{BiOBr/TiO}_2$ , and  $\text{BiOBr-Cu}^{2+}/\text{TiO}_2$ .

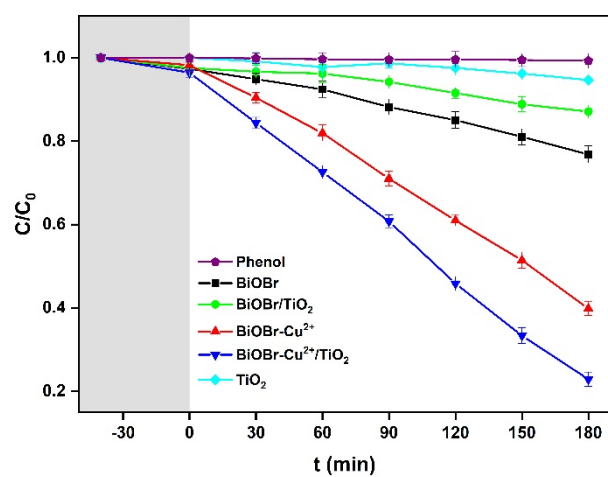

Figure S3 The photodegradation efficiency of phenol on different photocatalysts.

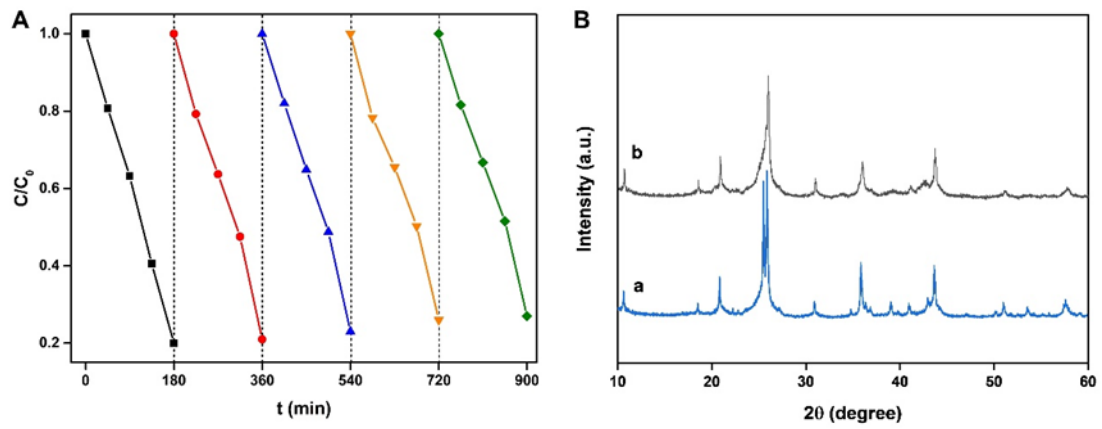

Figure S4. Reusability (A) of BiOBr-Cu<sup>2+</sup>/TiO<sub>2</sub> on photodegradation of phenol. XRD pattern (B) for fresh (a) and five-times recycled (b) BiOBr-Cu<sup>2+</sup>/TiO<sub>2</sub> sample.

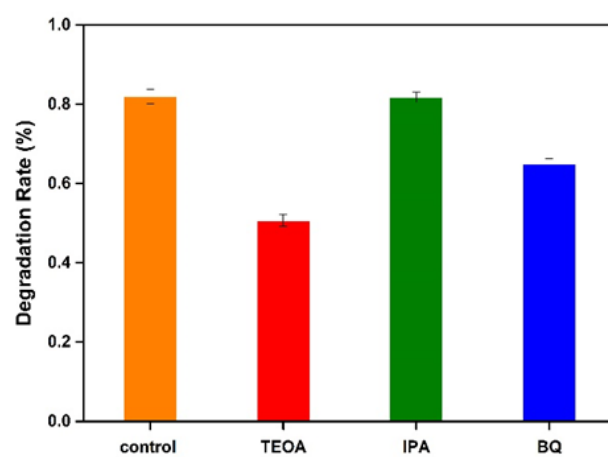

**Figure S5. The photocatalytic rate of BiOBr-Cu<sup>2+</sup>/TiO<sub>2</sub> in the presence of different scavengers.**

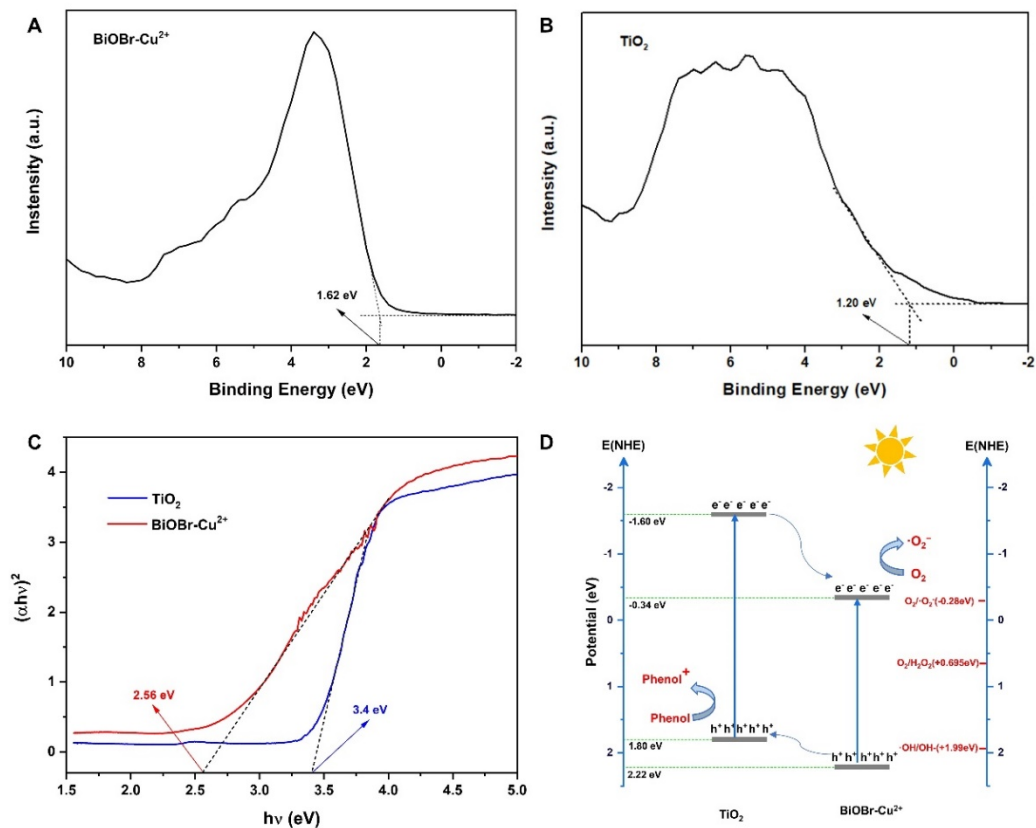

Figure S6. XPS valence-band spectra of BiOBr-Cu<sup>2+</sup> (A) and TiO<sub>2</sub> (B); Tauc's plot (C) of BiOBr-Cu<sup>2+</sup>, TiO<sub>2</sub>; Possible photocatalytic reactions (D) of BiOBr-Cu<sup>2+</sup>/TiO<sub>2</sub> heterojunctions

**Table S1 The model parameters of pseudo-first order, pseudo-second order, and intraparticle diffusion kinetics.**

| Kinetic models              | Parameters                                     | BiOBr-Cu <sup>2+</sup> /TiO <sub>2</sub> |
|-----------------------------|------------------------------------------------|------------------------------------------|
| <i>pseudo</i> -first-order  | $Q_{e,f}^a$ (mg g <sup>-1</sup> )              | 2.98                                     |
|                             | $k_1$ (min <sup>-1</sup> )                     | 0.0837                                   |
|                             | $R^2$                                          | 0.993                                    |
| <i>pseudo</i> -second-order | $Q_{e,s}^a$ (mg g <sup>-1</sup> )              | 3.58                                     |
|                             | $k_2$ (g mg <sup>-1</sup> min <sup>-1</sup> )  | 0.222                                    |
|                             | $v_0$ (mg g <sup>-1</sup> min <sup>-1</sup> )  | 0.352                                    |
|                             | $R^2$                                          | 0.994                                    |
| Intraparticle diffusion     | $k_i$ (mg L <sup>-1</sup> min <sup>1/2</sup> ) | 0.310                                    |
|                             | $C_i$                                          | 0.886                                    |
|                             | $R^2$                                          | 0.931                                    |



**Table S2 Comparison of the phenol adsorption and photocatalytic degradation between BiOBr-Cu<sup>2+</sup>/TiO<sub>2</sub> and other adsorbents reported in the literatures.**

| Adsorbent                                         | Adsorption                              |                       | Photodegradation                          |                       |                     |                                     | Ref.      |
|---------------------------------------------------|-----------------------------------------|-----------------------|-------------------------------------------|-----------------------|---------------------|-------------------------------------|-----------|
|                                                   | Adsorption capacity, mg g <sup>-1</sup> | Equilibrium time, min | Initial concentration, mg L <sup>-1</sup> | Degradation degree, % | Treatment time, min | Degradation rate, min <sup>-1</sup> |           |
| BiOBr-Cu <sup>2+</sup> /TiO <sub>2</sub>          | 2.91                                    | 40                    | 10                                        | 85.0                  | 180                 | 9.6 × 10 <sup>-3</sup>              | This work |
| TiO <sub>2</sub> /ZnAl                            | 0.15                                    | 120                   | 10                                        | 55.7                  | 120                 | 6.0 × 10 <sup>-3</sup>              | [R1]      |
| γ-Al <sub>2</sub> O <sub>3</sub> TiO <sub>2</sub> | — <sup>a</sup>                          | 60                    | 40                                        | -                     | 360                 | 2.5 × 10 <sup>-3</sup>              | [R2]      |
| ZnAl LDH–SDS                                      | × <sup>b</sup>                          | 60                    | 40                                        | 95.0                  | 420                 | -                                   | [R3]      |
| 01%Pd-0.5%Au/TiO <sub>2</sub>                     | -                                       | 120                   | 94.11                                     | 69                    | 120                 | 5.5 × 10 <sup>-3</sup>              | [R4]      |

<sup>a</sup> means it is not mentioned or calculated.

<sup>b</sup> represents almost no adsorption

## References

- [R1] J.C. Contreras-Ruiz, S. Martínez-Gallegos, J.L. García-Rivas, J. Illescas, J.C. González-Juárez, G. Macedo Miranda, E. Ordoñez Regil, Influence of the textural parameters of LDH-TiO<sub>2</sub> composites on phenol adsorption and photodegradation capacities, *Int. J. Photoenergy* 2019 (2019) 1–11.
- [R2] C. Martínez-Gómez, I. Rangel-Vazquez, R. Zarraga, G. Del Ángel, B. Ruíz-Camacho, F. Tzompantzi, E. Vidal-Robles, A. Perez-Larios, Photodegradation and mineralization of phenol using TiO<sub>2</sub> coated γ-Al<sub>2</sub>O<sub>3</sub>: effect of thermic treatment, *Processes* 10 (2022) 1186.
- [R3] G. Romero Ortiz, L. Lartundo-Rojas, J.E. Samaniego-Benítez, Y. Jiménez-Flores, H.A. Calderón, A. Mantilla, Photocatalytic behavior for the phenol degradation of ZnAl layered double hydroxide functionalized with SDS, *J. Environ. Manage.* 277 (2021) 111399.
- [R4] M.T. Yilleng, E.C. Gimba, G.I. Ndukwe, I.M. Bugaje, D.W. Rooney, H.G. Manyar, Batch to continuous photocatalytic degradation of phenol using TiO<sub>2</sub> and Au-Pd nanoparticles supported on TiO<sub>2</sub>, *J. Environ. Chem. Eng.* 6 (2018) 6382–6389.
